# Supplementary material for: Homeodomain-interacting protein kinase promotes tumorigenesis and metastatic cell behavior
Source: PubMed Central journal article supplement (PMC5818076; doi:10.1242/dmm.031146), 2018-01-01
Supplement: dmm-11-031146-s1.pdf [file dmm-11-031146-s1.pdf]

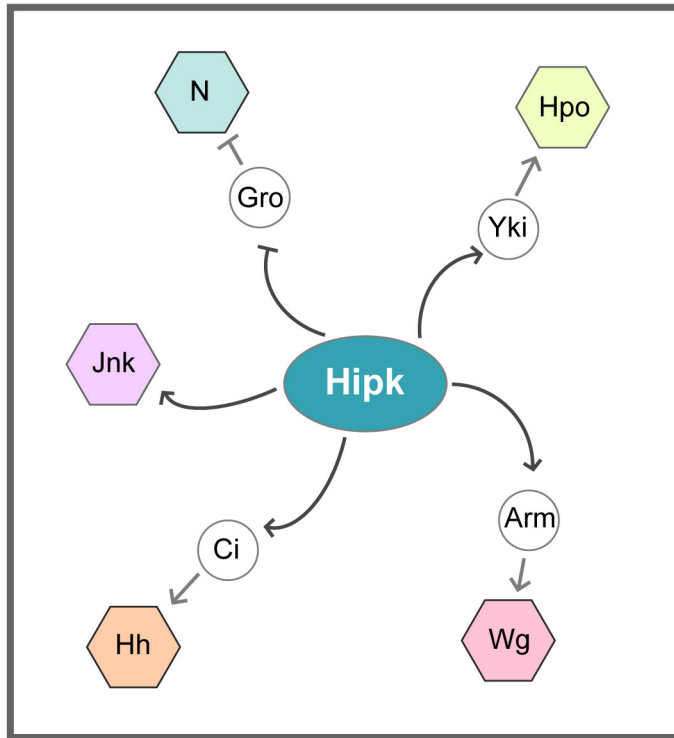

**Figure S1. Hipk regulates numerous signaling pathways.** A schematic diagram depicting Hipk's known relationships with many of the conserved signaling pathways.

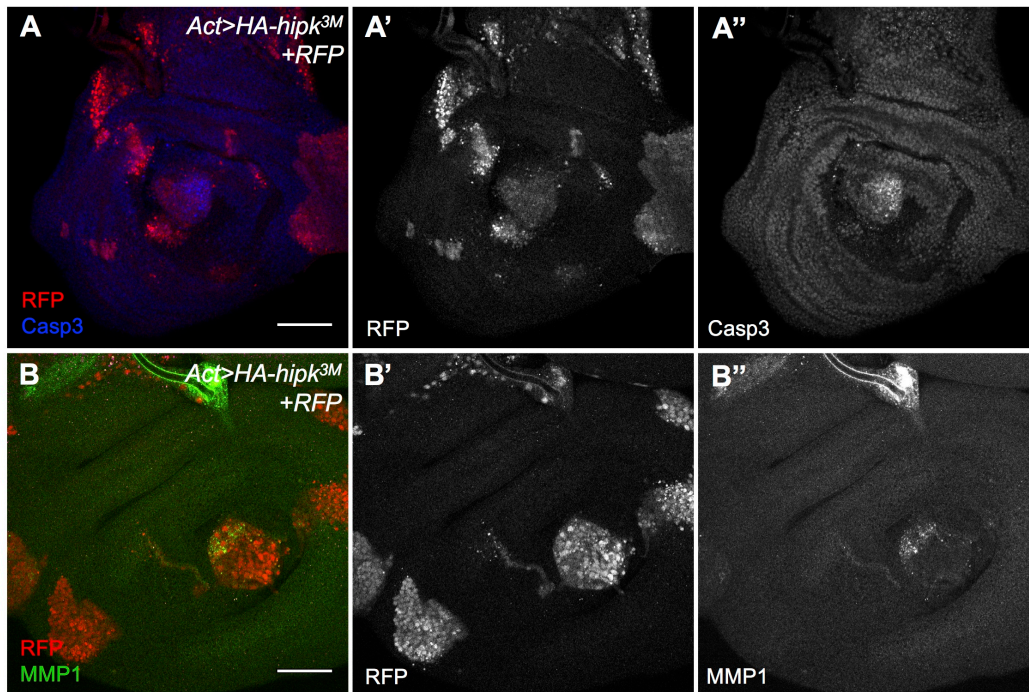

**Figure S2: Hipk induces cell autonomous expression of Cleaved Caspase 3 and MMP1.** Actin flp-out clones expressing *HA-hipk<sup>3M</sup>* and marked with *UAS-RFP* were generated in wing imaginal discs. Anti-cleaved Caspase 3 antibody (shown in blue, A, A'') and anti-MMP1 staining (shown in green, B, B'') reveal low level cell autonomous induction.

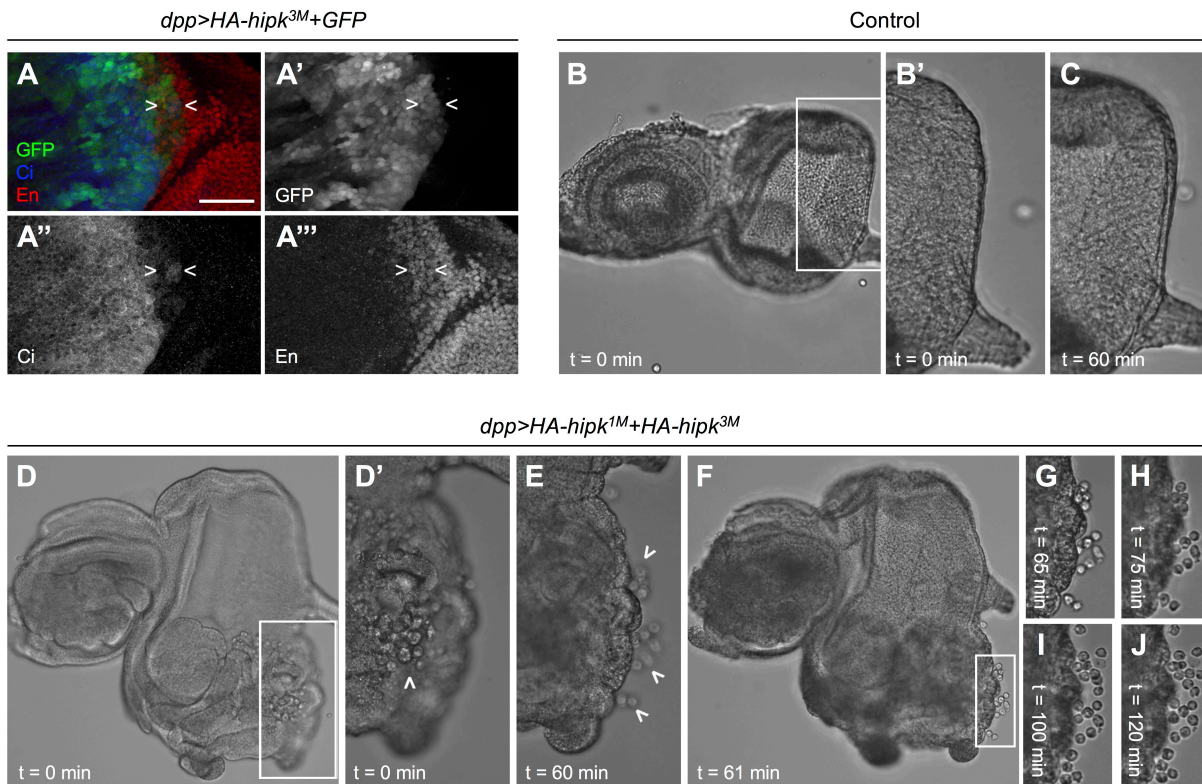

**Figure S3: Hipk induces cell spreading.** (A) A zoom-in of a *dpp>HA-hipk<sup>3M</sup>+GFP* wing disc (similar to Fig. 3C) stained for Ci and En. Arrowheads mark a cluster of cells that simultaneously express GFP (A'), Ci (A''), and En (A'''). (B) A DIC image of a control eye disc. Live imaging stills of the zoomed-in control disc show that cells do not leave the disc after 60 mins (B', C). (D) At t = 0 mins a ventral overgrowth is present in the *dpp>HA-hipk<sup>1M</sup>+HA-hipk<sup>3M</sup>* eye disc. Zoomed-in images (D', E) reveal that cells leave the disc over a 60-min period (arrowheads). (F-J) At t = 65 mins, 12 extruded cells are next to the disc. Over the next 55 mins, those 12 cells amplify to reach a cell count of 21 (J). Boxed-in regions represent areas of corresponding zoom-ins. Scale bars equal 50µm.

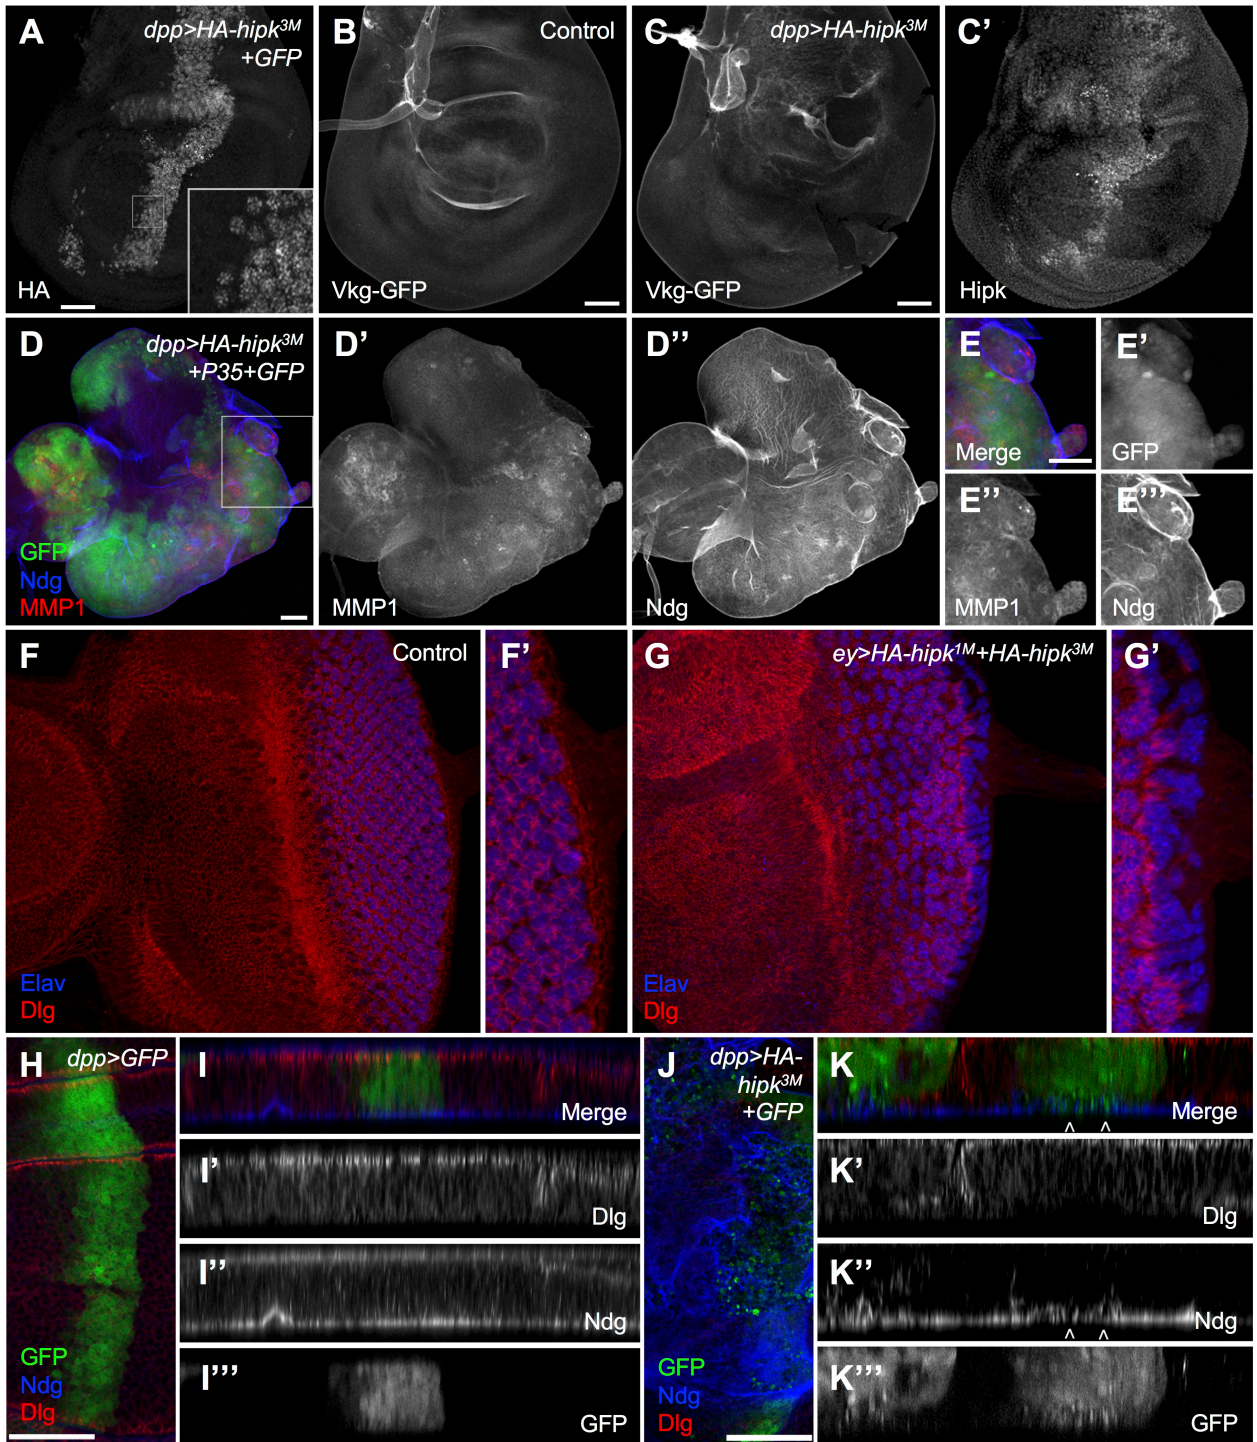

**Figure S4: Hipk alters epithelial integrity.**

(A) Anti-HA antibody reveals that *UAS-HA-hipk<sup>3M</sup>* expression is nuclear (inset shows zoom-in). (B) A control disc shows the expression pattern of a basement membrane component Collagen IV (called Viking, Vkg, in Drosophila) using *Vkg-GFP*. (C) In *dpp>HA-hipk<sup>3M</sup>* wing discs, inconsistencies in the normal Vkg pattern are present in the *dpp-Gal4* expression domain. (C') anti-Hipk stain in *dpp>HA-hipk<sup>3M</sup>* reveals that effects on Vkg are cell autonomous. (D-D'') When cell death is blocked in *dpp>HA-hipk<sup>3M</sup>+P35+GFP* wing discs, MMP1 is dramatically up-regulated and Ndg is disrupted (compared to normal pattern seen in Fig. 4C). (E-E''') Zoom in on white box shown in D reveals high levels of MMP1 in GFP positive cells, as well as abnormal Ndg stain indicating disruptions in basement membrane. (F) Control eye disc stained for Elav (blue) and Dlg (red). (F') zoom of posterior region of eye disc. (G) *ey>HA-hipk<sup>1M</sup>+HA-hipk<sup>3M</sup>* disc stained for Elav to reveal photoreceptors (blue) and Dlg to highlight apical domains (red). (G') zoom of posterior region of eye disc. (H) *dpp>GFP* expressing cells in the center of the wing pouch, stained for Dlg to highlight apical domains and Ndg to reveal basement membrane, and GFP to show *dpp* expression domain. (I) Cross section of tissue shown in Fig. 4H. (J) A *dpp>HA-hipk<sup>3M</sup>+GFP* disc stained for Dlg, Ndg and GFP. (K) A cross section of disc shown in Fig. 4J. Chevrons in K, K'' reveal sites of intercalation of GFP positive cells with basement membrane. Scale bars equal 50µm.

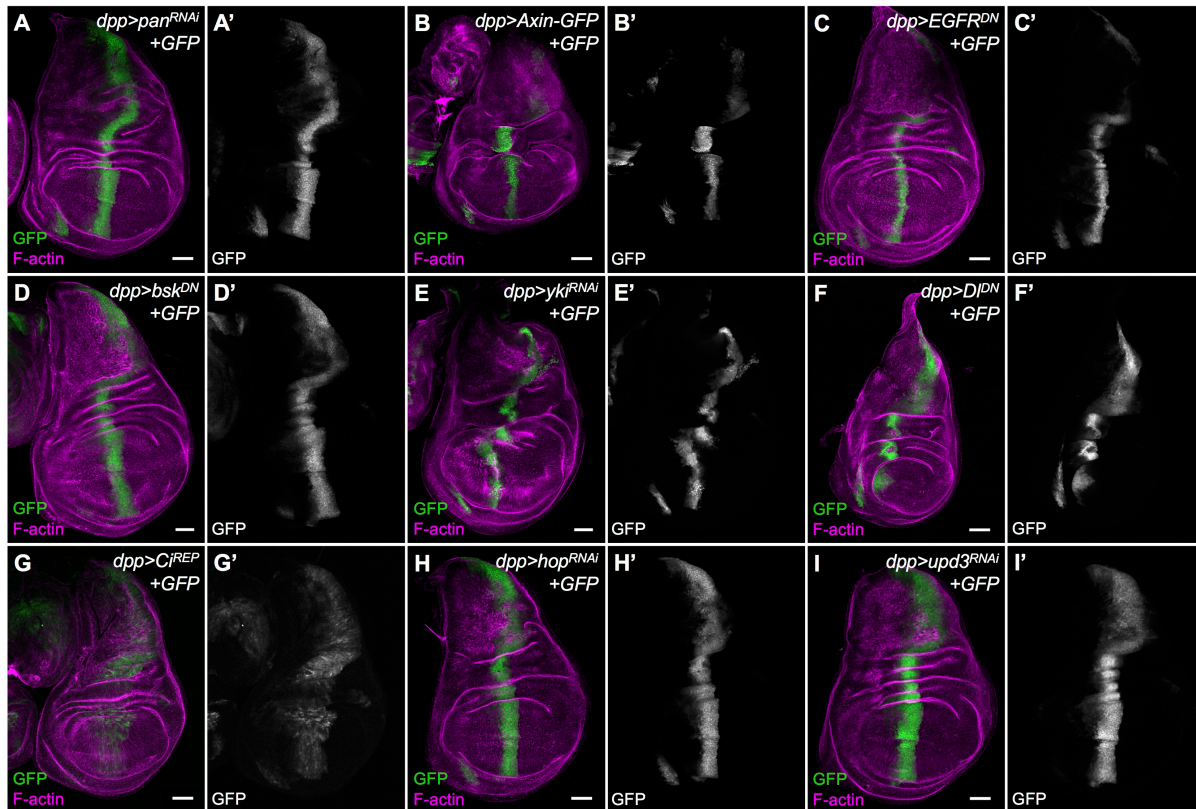

**Figure S5: Phenotypes of signaling pathway disruptors used in study**

The phenotypes of various UAS lines used in genetic analyses when driven by dpp-GAL4 were determined. Genotypes are indicated in panels. Discs were stained for GFP to reveal cells expressing transgenes and F-actin to reveal disc morphology. The following pathways were targeted with the indicated transgenes: Wg, using (A) *UAS-pan<sup>RNAi</sup>* [dTCF] and (B) *UAS-Axin-GFP*; EGFR, using (C) *UAS-EGFR<sup>DN</sup>*; JNK, using (D) *UAS-bsk<sup>DN</sup>*; Hippo, using (E) *UAS-yki<sup>RNAi</sup>*; Notch, using (F) *UAS-DI<sup>DN</sup>*; Hedgehog, using (G) *UAS-C<sup>REP</sup>*; JAK/STAT using (H) *UAS-hop<sup>RNAi</sup>* and (I) *UAS-upd3<sup>RNAi</sup>*.

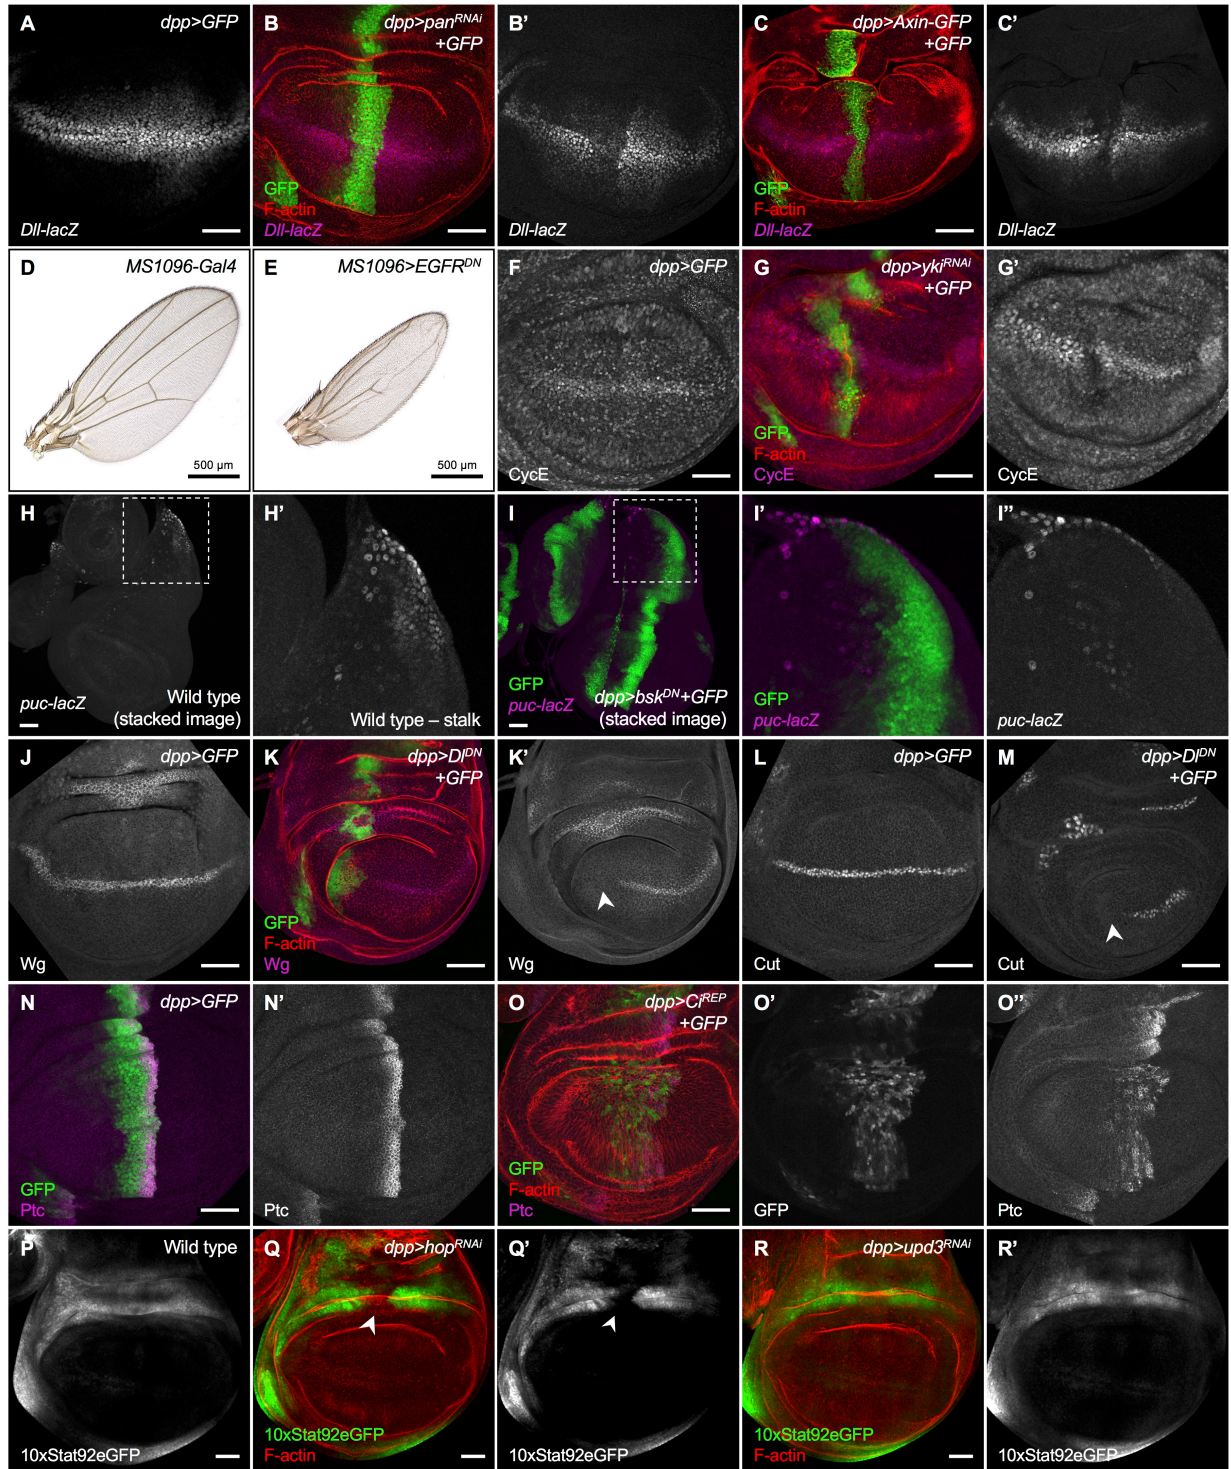

### Figure S6: Validation of signaling pathway disruption by reagents used in study.

To validate that all transgenes used in the study targeted their respective pathways, we examined either phenotypes or changes in target genes following GAL4-driven expression of either GFP or the indicated transgenes. Discs were stained for targets, GFP (to reveal cells expressing transgenes) and F-actin to reveal disc morphology:

(A) *dpp>GFP*, (B) *UAS-pan<sup>RNAi</sup>+GFP* [dTCF] and (C) *UAS-Axin-GFP +GFP* stained for Wg target *Dll-lacZ*. (D) *MS1096-GAL4* control adult wing. (E) *MS1096>UAS-EGFR<sup>DN</sup>* adult showing typical EGFR loss of function vein loss phenotype. (F) *dpp>GFP*, (G) *UAS-yki<sup>RNAi</sup>+GFP* stained using antibody for Hippo target gene CycE. (H) Control wing disc stained for JNK target *puc-lacZ*. (H') Inset shows expression in stalk of disc. (I) *dpp>UAS-bsk<sup>DN</sup>+GFP* stained to reveal reduced *puc-lacZ*. (J) *dpp>GFP* and (K) *dpp>UAS-Dl<sup>DN</sup>+GFP* stained for the Notch target Wg. (L) *dpp>GFP* and (M) *dpp>UAS-Dl<sup>DN</sup>+GFP* stained for the Notch target Cut. (N) *dpp>GFP* and (O) *UAS-Ci<sup>Rep</sup>+GFP* stained to reveal Hedgehog target Ptc. (P) Control disc, (Q) *dpp>UAS-hop<sup>RNAi</sup>* and (R) *dpp>UAS-upd3<sup>RNAi</sup>* expressing the 10xStat92EGFP reporter for JAK/STAT signaling, stained for GFP.



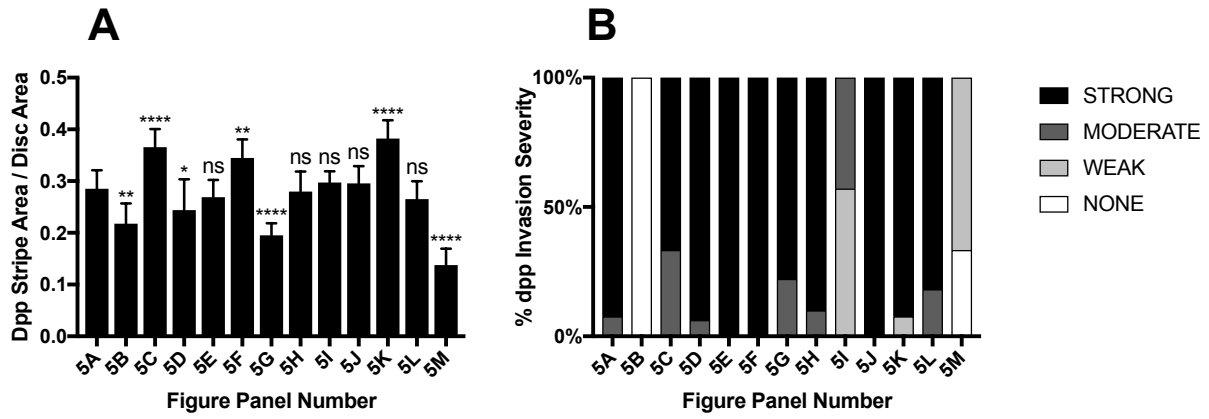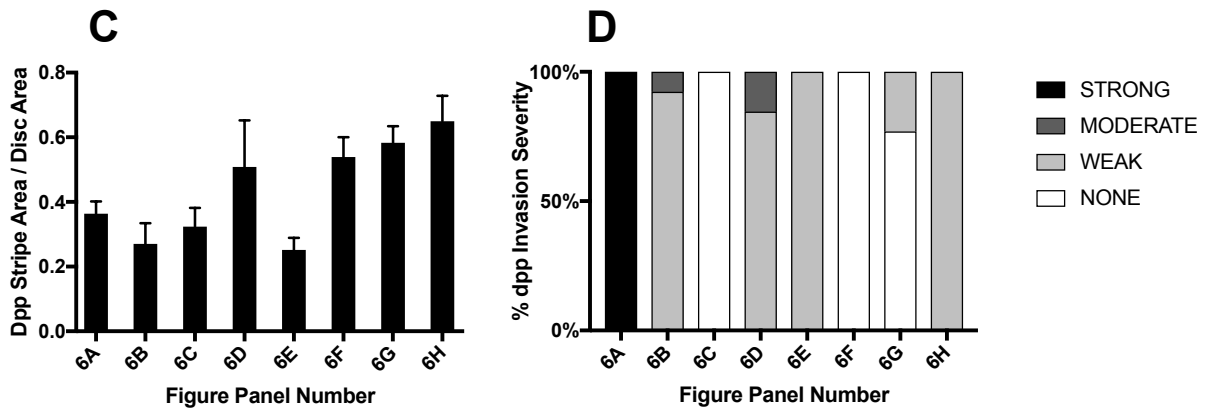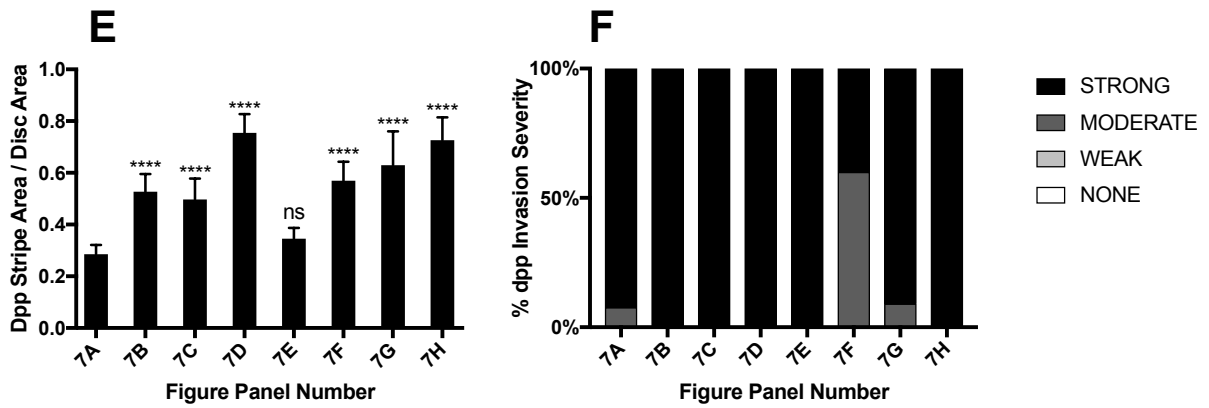

## Figure S7: Quantification of proliferative areas in discs and degree of invasiveness in Figs. 5-7

Imaginal disc size measurements and invasiveness scoring were performed as described in methods. The genotypes in the following charts are:

### Panels A-B

- 5A *dpp>HA-hipk<sup>3M</sup>, UAS-RFP, UAS-GFP*
- 5B *dpp>HA-hipk<sup>3M</sup>, UAS-hipk<sup>RNAi</sup>, UAS-GFP*
- 5C *dpp>HA-hipk<sup>3M</sup>, UAS-pan<sup>RNAi</sup>, UAS-GFP*
- 5D *dpp>HA-hipk<sup>3M</sup>, UAS-Axin-GFP, UAS-GFP*
- 5E *dpp>HA-hipk<sup>3M</sup>, UAS-EGFR<sup>DN</sup>, UAS-GFP*
- 5F *dpp>HA-hipk<sup>3M</sup>, UAS-Bsk<sup>DN</sup>, UAS-GFP*
- 5G *dpp>HA-hipk<sup>3M</sup>, UAS-yki<sup>RNAi</sup>, UAS-GFP*
- 5H *dpp>HA-hipk<sup>3M</sup>, UAS-Dl<sup>DN</sup>, UAS-GFP*
- 5I *dpp>HA-hipk<sup>3M</sup>, UAS-Ci<sup>Rep</sup>, UAS-GFP*
- 5J *dpp>HA-hipk<sup>3M</sup>, UAS-hop<sup>RNAi</sup>, UAS-GFP*
- 5K *dpp>HA-hipk<sup>3M</sup>, UAS-upd3<sup>RNAi</sup>, UAS-GFP*
- 5L *dpp>HA-hipk<sup>3M</sup>*
- 5M *dpp>HA-hipk<sup>3M</sup>, UAS-yki<sup>RNAi</sup>, UAS-Bsk<sup>DN</sup>*

### Panels C-D

- 6A *dpp>HA-hipk<sup>3M</sup>, UAS-GFP*
- 6B *dpp>UAS-Arm<sup>S10</sup>, UAS-GFP*
- 6C *dpp>UAS-stat92E, UAS-GFP*
- 6D *dpp>UAS-Ras<sup>act</sup>, UAS-GFP*
- 6E *dpp>UAS-eiger, UAS-GFP*
- 6F *dpp>UAS-yki<sup>S168A</sup>:GFP, UAS-GFP*
- 6G *dpp>UAS-N<sup>act</sup>, UAS-GFP*
- 6H *dpp>UAS-Ci, UAS-GFP*

### Panels E-F

- 7A *dpp>HA-hipk<sup>3M</sup>, UAS-RFP, UAS-GFP*
- 7B *dpp>HA-hipk<sup>3M</sup>, UAS-Arm<sup>S10</sup>, UAS-GFP*
- 7C *dpp>HA-hipk<sup>3M</sup>, UAS-stat92E, UAS-GFP*
- 7D *dpp>HA-hipk<sup>3M</sup>, UAS-Ras<sup>act</sup>, UAS-GFP*
- 7E *dpp>HA-hipk<sup>3M</sup>, UAS-eiger, UAS-GFP*
- 7F *dpp>HA-hipk<sup>3M</sup>, UAS-yki<sup>S168A</sup>:GFP, UAS-GFP*
- 7G *dpp>HA-hipk<sup>3M</sup>, UAS-N<sup>act</sup>, UAS-GFP*
- 7H *dpp>HA-hipk<sup>3M</sup>, UAS-Ci, UAS-GFP*

**Supplementary Table 1**

Signaling pathway reagents used in study

| Pathway name | Loss of function                                                | Gain of function               |
|--------------|-----------------------------------------------------------------|--------------------------------|
| Wingless     | <i>UAS-pan<sup>RNAi</sup></i> (TCF)<br><i>UAS-Axin</i>          | <i>UAS-Arm<sup>S10</sup></i>   |
| EGFR/Ras     | <i>UAS-EGFR<sup>DN</sup></i>                                    | <i>UAS-Ras<sup>act</sup></i>   |
| JNK          | <i>UAS-bsk<sup>DN</sup></i>                                     | <i>UAS-Eiger</i>               |
| Hippo        | <i>UAS-Yki<sup>S168A</sup></i>                                  | <i>UAS-yki<sup>RNAi</sup></i>  |
| Notch        | <i>UAS-Delta<sup>DN</sup></i>                                   | <i>UAS-Notch<sup>act</sup></i> |
| Hedgehog     | <i>UAS-Ci<sup>Rep</sup></i>                                     | <i>UAS-Ci<sup>5M</sup></i>     |
| JAK/STAT     | <i>UAS-hop<sup>RNAi</sup></i><br><i>UAS-upd3<sup>RNAi</sup></i> | <i>UAS-Stat92E</i>             |

See Methods for details on strains

Supplementary Table 2: Raw data

| qPCR Ct, ΔCt, ΔΔCt, and 2 <sup>-ΔΔCt</sup> values for MDAMB231 cells transfected with either pCMV-myc (control) or pCMV-myc-dHipk (transfected) |                    |                  |               |                   |              |                  |
|-------------------------------------------------------------------------------------------------------------------------------------------------|--------------------|------------------|---------------|-------------------|--------------|------------------|
|                                                                                                                                                 | Tested genes       |                  |               |                   |              |                  |
|                                                                                                                                                 | HPRT control       | HPRT transfected | dHipk control | dHipk transfected | ECAD control | ECAD transfected |
| Replicate #                                                                                                                                     | Ct                 |                  |               |                   |              |                  |
| 1                                                                                                                                               | 20.458896          | 20.45409838      | N/A           | 24.61656284       | 25.48129463  | 28.54435476      |
| 2                                                                                                                                               | 22.92055257        | 22.6063563       | N/A           | 23.47188314       | 24.72272491  | 28.18616803      |
| 3                                                                                                                                               | 23.66424179        | 23.38731893      | N/A           | 24.24551392       | 19.63424428  | 24.56048902      |
|                                                                                                                                                 | ΔCt                |                  |               |                   |              |                  |
| 1                                                                                                                                               |                    |                  | Not Possible  | 0.865526835       | 5.022398631  | 8.090256373      |
| 2                                                                                                                                               |                    |                  | Not Possible  | 1.199629784       | 1.802172343  | 5.579811732      |
| 3                                                                                                                                               |                    |                  | Not Possible  | 0.858194987       | -4.029997508 | 1.17317009       |
|                                                                                                                                                 | ΔΔCt               |                  |               |                   |              |                  |
| 1                                                                                                                                               |                    |                  |               |                   |              | 3.067857742      |
| 2                                                                                                                                               |                    |                  |               |                   |              | 3.777639389      |
| 3                                                                                                                                               |                    |                  |               |                   |              | 5.203167597      |
|                                                                                                                                                 | 2 <sup>-ΔΔCt</sup> |                  |               |                   |              |                  |
| 1                                                                                                                                               |                    |                  |               |                   |              | 0.119256703      |
| 2                                                                                                                                               |                    |                  |               |                   |              | 0.744480933      |
| 3                                                                                                                                               |                    |                  |               |                   |              | 0.02714504       |

Supplementary Table 3:

| Migration RFU data normalized to the average of the control |             |                |
|-------------------------------------------------------------|-------------|----------------|
|                                                             | MDA-MB-231  |                |
| Replicate #                                                 | Control     | pCMV-myc-dHipk |
| 1                                                           | 1.097433015 | 2.138842046    |
| 2                                                           | 0.977562301 | 2.333286491    |
| 3                                                           | 0.924957841 | 1.624554993    |
| 4                                                           | 0.895780078 | 2.839919541    |
| 5                                                           | 1.039014374 | 2.683526799    |
| 6                                                           | 1.065205548 | 2.445585216    |
| 7                                                           | 1.0151289   | 1.031069312    |
| 8                                                           | 0.817120002 | 1.148883447    |
| 9                                                           | 1.167736606 | 1.331502601    |
| 10                                                          | 1.149188902 |                |
| 11                                                          | 1.096471069 |                |
| 12                                                          | 0.754339601 |                |

Supplementary Table 4: Raw data

| Proliferation measured by OD @ 540nm |         |                |         |                |          |                |
|--------------------------------------|---------|----------------|---------|----------------|----------|----------------|
|                                      | HEK293  |                | MCF7    |                | MDAMB231 |                |
| Replicate #                          | Control | pCMV-myc-dHipk | Control | pCMV-myc-dHipk | Control  | pCMV-myc-dHipk |
| 1                                    | 1.1751  | 2.0414         | 0.8615  | 1.074          | 0.6322   | 1.0617         |
| 2                                    | 1.179   | 2.1293         | 0.8662  | 1.1075         | 0.6578   | 1.0742         |
| 3                                    | 1.1286  | 2.1211         | 0.8735  | 1.1129         | 0.647    | 1.0655         |

Supplementary Table 5: Raw data

| <i>dpp</i> Stripe Area / Disc Area Ratio Data for Figure 5 |       |       |       |       |       |       |       |       |       |       |       |       |       |
|------------------------------------------------------------|-------|-------|-------|-------|-------|-------|-------|-------|-------|-------|-------|-------|-------|
| Replicate #                                                | 5A    | 5B    | 5C    | 5D    | 5E    | 5F    | 5G    | 5H    | 5I    | 5J    | 5K    | 5L    | 5M    |
| 1                                                          | 0.282 | 0.289 | 0.294 | 0.321 | 0.250 | 0.336 | 0.176 | 0.248 | 0.270 | 0.239 | 0.418 | 0.243 | 0.100 |
| 2                                                          | 0.357 | 0.209 | 0.355 | 0.250 | 0.238 | 0.352 | 0.191 | 0.325 | 0.324 | 0.263 | 0.335 | 0.332 | 0.113 |
| 3                                                          | 0.241 | 0.214 | 0.377 | 0.315 | 0.316 | 0.305 | 0.221 | 0.292 | 0.266 | 0.301 | 0.358 | 0.262 | 0.141 |
| 4                                                          | 0.277 | 0.169 | 0.391 | 0.314 | 0.233 | 0.349 | 0.162 | 0.229 | 0.300 | 0.281 | 0.430 | 0.236 | 0.111 |
| 5                                                          | 0.303 | 0.218 | 0.334 | 0.282 | 0.291 | 0.384 | 0.176 | 0.317 | 0.307 | 0.310 | 0.369 | 0.307 | 0.135 |
| 6                                                          | 0.235 | 0.206 | 0.413 | 0.158 | 0.235 | 0.386 | 0.182 | 0.213 | 0.301 | 0.333 | 0.394 | 0.226 | 0.127 |
| 7                                                          | 0.306 |       | 0.339 | 0.235 | 0.297 | 0.336 | 0.220 | 0.307 | 0.313 | 0.297 | 0.341 | 0.301 | 0.155 |
| 8                                                          | 0.276 |       | 0.407 | 0.241 | 0.258 | 0.334 | 0.195 | 0.303 |       | 0.350 | 0.329 | 0.238 | 0.184 |
| 9                                                          | 0.297 |       | 0.392 | 0.222 | 0.318 | 0.389 | 0.225 | 0.265 |       | 0.296 | 0.400 | 0.275 | 0.167 |
| 10                                                         | 0.330 |       | 0.386 | 0.303 | 0.255 | 0.278 | 0.220 | 0.298 |       | 0.322 | 0.427 | 0.257 | 0.087 |
| 11                                                         | 0.294 |       | 0.347 | 0.162 |       |       | 0.191 |       |       | 0.262 | 0.419 | 0.239 | 0.156 |
| 12                                                         | 0.236 |       | 0.353 | 0.223 |       |       | 0.223 |       |       |       | 0.384 |       | 0.179 |
| 13                                                         | 0.274 |       |       | 0.166 |       |       | 0.195 |       |       |       | 0.366 |       |       |
| 14                                                         |       |       |       | 0.300 |       |       | 0.218 |       |       |       |       |       |       |
| 15                                                         |       |       |       | 0.255 |       |       | 0.190 |       |       |       |       |       |       |
| 16                                                         |       |       |       | 0.158 |       |       | 0.176 |       |       |       |       |       |       |
| 17                                                         |       |       |       |       |       |       | 0.147 |       |       |       |       |       |       |
| 18                                                         |       |       |       |       |       |       | 0.209 |       |       |       |       |       |       |

Supplementary Table 6: Raw data

| <i>dpp</i> Stripe Area / Disc Area Ratio Data for Figure 6 |       |       |       |       |       |       |       |       |
|------------------------------------------------------------|-------|-------|-------|-------|-------|-------|-------|-------|
| Replicate #                                                | 6A    | 6B    | 6C    | 6D    | 6E    | 6F    | 6G    | 6H    |
| 1                                                          | 0.388 | 0.229 | 0.445 | 0.711 | 0.213 | 0.569 | 0.531 | 0.622 |
| 2                                                          | 0.389 | 0.302 | 0.395 | 0.688 | 0.249 | 0.557 | 0.635 | 0.605 |
| 3                                                          | 0.308 | 0.250 | 0.287 | 0.544 | 0.208 | 0.464 | 0.546 | 0.713 |
| 4                                                          | 0.366 | 0.225 | 0.295 | 0.789 | 0.226 | 0.449 | 0.546 | 0.681 |
| 5                                                          |       | 0.231 | 0.295 | 0.427 | 0.287 | 0.511 | 0.530 | 0.653 |
| 6                                                          |       | 0.234 | 0.315 | 0.466 | 0.313 | 0.558 | 0.642 | 0.584 |
| 7                                                          |       | 0.186 | 0.271 | 0.441 | 0.246 | 0.581 | 0.602 | 0.734 |
| 8                                                          |       | 0.334 | 0.262 | 0.438 | 0.234 | 0.608 | 0.668 | 0.641 |
| 9                                                          |       | 0.369 | 0.395 | 0.381 | 0.291 | 0.657 | 0.503 | 0.521 |
| 10                                                         |       | 0.230 | 0.375 | 0.592 |       | 0.500 | 0.614 | 0.593 |
| 11                                                         |       | 0.230 | 0.303 | 0.373 |       | 0.490 | 0.554 | 0.801 |
| 12                                                         |       | 0.301 | 0.291 | 0.345 |       | 0.527 | 0.615 |       |
| 13                                                         |       | 0.397 | 0.328 | 0.412 |       |       | 0.597 |       |
| 14                                                         |       |       | 0.361 |       |       |       |       |       |
| 15                                                         |       |       | 0.241 |       |       |       |       |       |

Supplementary Table 7: Raw data

| <i>dpp</i> Stripe Area / Disc Area Ratio Data for Figure 7 |       |       |       |       |       |       |       |       |
|------------------------------------------------------------|-------|-------|-------|-------|-------|-------|-------|-------|
| Replicate #                                                | 7A    | 7B    | 7C    | 7D    | 7E    | 7F    | 7G    | 7H    |
| 1                                                          | 0.282 | 0.506 | 0.552 | 0.769 | 0.324 | 0.577 | 0.722 | 0.671 |
| 2                                                          | 0.357 | 0.543 | 0.474 | 0.854 | 0.403 | 0.652 | 0.771 | 0.838 |
| 3                                                          | 0.241 | 0.649 | 0.670 | 0.761 | 0.379 | 0.610 | 0.850 | 0.818 |
| 4                                                          | 0.277 | 0.556 | 0.410 | 0.790 | 0.354 | 0.647 | 0.576 | 0.544 |
| 5                                                          | 0.303 | 0.519 | 0.456 | 0.749 | 0.346 | 0.562 | 0.614 | 0.630 |
| 6                                                          | 0.235 | 0.583 | 0.506 | 0.806 | 0.325 | 0.531 | 0.561 | 0.748 |
| 7                                                          | 0.306 | 0.545 | 0.419 | 0.621 | 0.365 | 0.472 | 0.370 | 0.796 |
| 8                                                          | 0.276 | 0.546 | 0.568 | 0.689 | 0.337 | 0.506 | 0.613 | 0.681 |
| 9                                                          | 0.297 | 0.526 | 0.432 |       | 0.265 | 0.474 | 0.726 | 0.729 |
| 10                                                         | 0.330 | 0.335 | 0.484 |       | 0.303 | 0.666 | 0.549 | 0.774 |
| 11                                                         | 0.294 | 0.482 |       |       | 0.402 |       | 0.569 | 0.763 |
| 12                                                         | 0.236 | 0.494 |       |       |       |       |       |       |
| 13                                                         | 0.274 | 0.579 |       |       |       |       |       |       |
| 14                                                         |       | 0.555 |       |       |       |       |       |       |
| 15                                                         |       | 0.483 |       |       |       |       |       |       |

Supplementary Table 8: Raw data

| <i>dpp</i> Invasion Severity Data for Figure 5 |    |    |    |    |    |    |    |    |    |    |    |    |    |
|------------------------------------------------|----|----|----|----|----|----|----|----|----|----|----|----|----|
| Severity                                       | 5A | 5B | 5C | 5D | 5E | 5F | 5G | 5H | 5I | 5J | 5K | 5L | 5M |
| Strong                                         | 12 | 0  | 8  | 15 | 10 | 10 | 14 | 9  | 0  | 11 | 12 | 9  | 0  |
| Moderate                                       | 1  | 0  | 4  | 1  | 0  | 0  | 4  | 1  | 3  | 0  | 0  | 2  | 0  |
| Weak                                           | 0  | 0  | 0  | 0  | 0  | 0  | 0  | 0  | 4  | 0  | 1  | 0  | 8  |
| None                                           | 0  | 6  | 0  | 0  | 0  | 0  | 0  | 0  | 0  | 0  | 0  | 0  | 4  |

Supplementary Table 9: Raw data

| <i>dpp</i> Invasion Severity Data for Figure 6 |    |    |    |    |    |    |    |    |
|------------------------------------------------|----|----|----|----|----|----|----|----|
| Severity                                       | 6A | 6B | 6C | 6D | 6E | 6F | 6G | 6H |
| Strong                                         | 4  | 0  | 0  | 0  | 0  | 0  | 0  | 0  |
| Moderate                                       | 0  | 1  | 0  | 2  | 0  | 0  | 0  | 0  |
| Weak                                           | 0  | 12 | 0  | 11 | 9  | 0  | 3  | 11 |
| None                                           | 0  | 0  | 15 | 0  | 0  | 12 | 10 | 0  |

Supplementary Table 10: Raw data

| <i>dpp</i> Invasion Severity Data for Figure 7 |    |    |    |    |    |    |    |    |
|------------------------------------------------|----|----|----|----|----|----|----|----|
| Severity                                       | 7A | 7B | 7C | 7D | 7E | 7F | 7G | 7H |
| Strong                                         | 12 | 15 | 10 | 8  | 11 | 4  | 10 | 11 |
| Moderate                                       | 1  | 0  | 0  | 0  | 0  | 6  | 1  | 0  |
| Weak                                           | 0  | 0  | 0  | 0  | 0  | 0  | 0  | 0  |
| None                                           | 0  | 0  | 0  | 0  | 0  | 0  | 0  | 0  |
